# Supplementary material for: ­Back-to-back mechanisms drive actomyosin ring closure during Drosophila embryo cleavage
Source: PubMed Central journal article supplement — J Cell Biol. 2016 Nov 7;215(3):335–44. doi: 10.1083/jcb.201608025 (PMC5100295; doi:10.1083/jcb.201608025), 2016-11-07
Supplement: JCB_201608025_sm.pdf [file JCB_201608025_sm.pdf]

Xue and Sokac, <http://dx.doi.org/10.1083/jcb.201608025>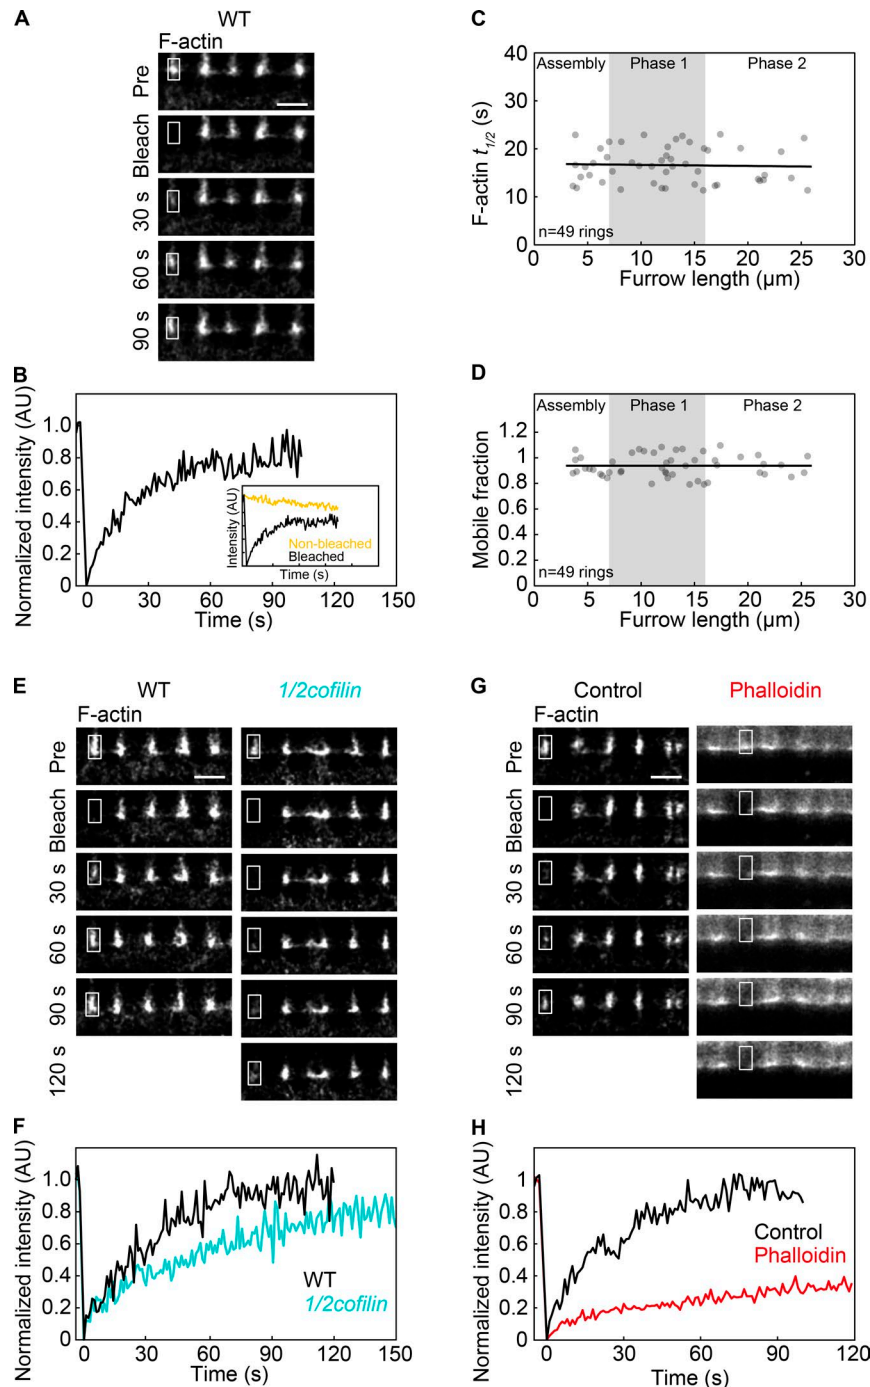

Figure S1. **F-actin disassembly is reduced in *1/2cofilin* and phalloidin-injected embryos.** (A) F-actin (G-actin<sup>Red</sup>) in a photobleached ring in cross section in a wild-type (WT) embryo. (B) Representative normalized curve from a FRAP experiment in a wild-type embryo. Inset shows raw data from nonbleached (yellow) and bleached (black) rings. (C and D)  $t_{1/2}$  (C) and percent mobile fraction (D) of F-actin in rings versus furrow length; each data point represents one FRAP experiment for a ring in cross section. Solid lines are linear fits;  $n = 49$  rings from 30 embryos. Gray shading highlights phase 1 in wild-type embryos. (E and G) F-actin (G-actin<sup>Red</sup>) in photobleached rings in cross section in wild-type, *1/2cofilin*, DMSO- (control), and phalloidin-injected embryos. (F and H) A representative normalized curve from one FRAP experiment in one wild-type (black in F), *1/2cofilin* (turquoise), control (black in H), or phalloidin-injected embryo (red). The mean  $\pm$  SE for  $n \geq 7$  rings from seven or more embryos per condition is shown in Fig. 4 (F and I). For A, E and G, box is the bleached region of interest; Pre, immediate prebleached frame; bleach, immediate post-bleach frame; seconds after bleaching. Bars, 5  $\mu\text{m}$ . For compiled FRAP results, see Table S1. AU, arbitrary units.

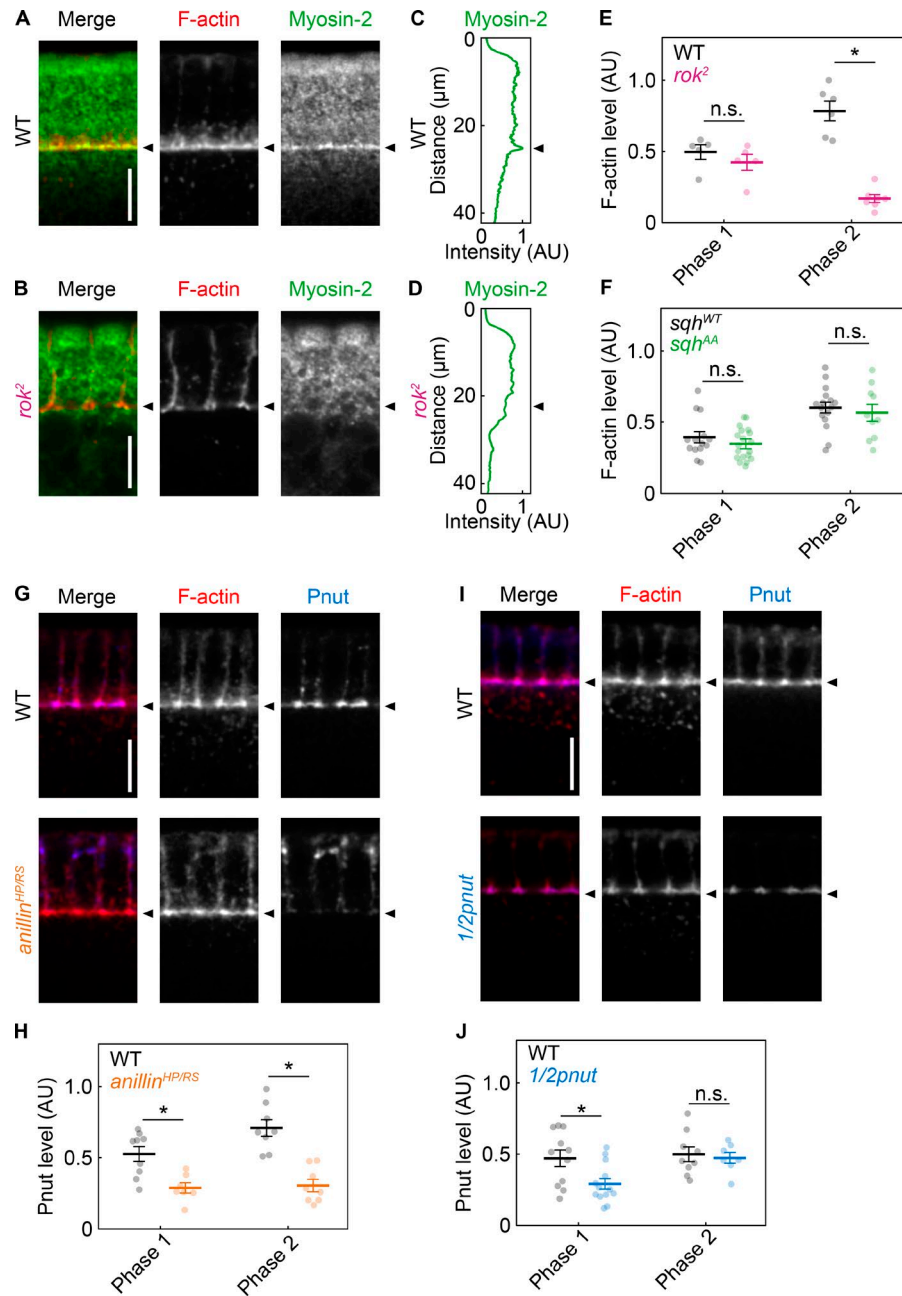

Figure S2. **Ring components are disrupted in *rok*<sup>2</sup>, *anillin*<sup>HP/RS</sup> and *1/2pnut* embryos.** (A and B) F-actin (phalloidin; red) and Myosin-2 (green) in rings in cross section in fixed wild-type (WT) and *rok*<sup>2</sup> embryos. (C and D) Distance from top of the single corresponding wild-type or *rok*<sup>2</sup> image in A or B versus fluorescence intensity of Myosin-2 (green) in arbitrary units (AU). Result repeated for images from 10 out of 10 wild-type embryos and 9 out of 9 *rok*<sup>2</sup> embryos. Arrowheads show ring position at furrow tips. (E and F) Fluorescence intensity of F-actin (phalloidin) in arbitrary units (AU) in phase 1 and 2 for fixed *rok*<sup>2</sup> mutants (pink; E) and *sqh*<sup>AA</sup> mutants (green; F) compared with wild type (black). (G) F-actin (phalloidin; red) and Pnut (blue) in rings in cross section in fixed wild-type and *anillin*<sup>HP/RS</sup> embryos. (H) Fluorescence intensity of Pnut in AU in phases 1 and 2 for fixed *anillin*<sup>HP/RS</sup> mutants (orange) compared with wild type (black). (I) F-actin (phalloidin; red) and Pnut (blue) in rings in cross section in fixed wild-type and *1/2pnut* embryos. (J) Fluorescence intensity of Pnut AU in phases 1 and 2 for fixed *1/2pnut* embryos (blue) compared with wild type (black). (A, B, G and I) Arrowheads show ring position at furrow tips. Bars, 10  $\mu$ m. (E, F, H and J) Each data point represents the mean of  $n \geq 8$  rings analyzed in one embryo. Small horizontal bars show mean  $\pm$  SE; \*,  $P < 0.05$ ; n.s., not significant.

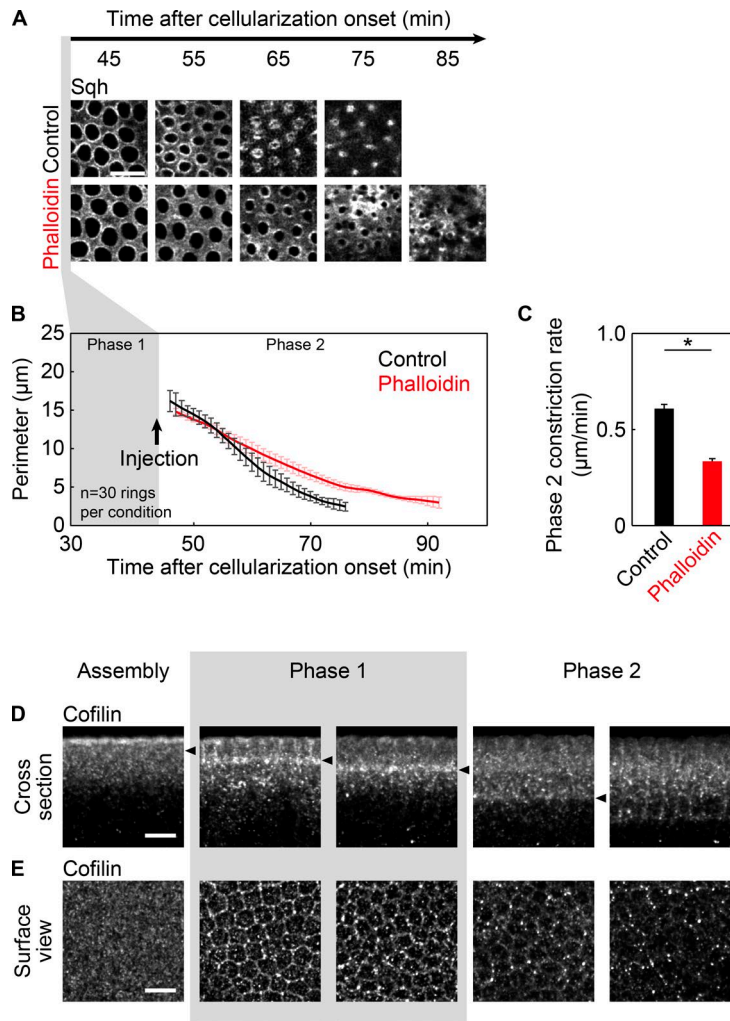

Figure S3. **F-actin disassembly is required for normal ring constriction in phase 2.** (A–C) Live DMSO (control; black) and phalloidin injected (phalloidin; red) embryos. (A) Rings (Sqh-GFP) constricting over time (minutes). (B) Ring perimeter versus time; (C) Constriction rate in phase 2. (D and E) Fixed wild-type embryos. (D) Rings stained for Cofilin in cross section or (E) surface views at furrow lengths of 3, 7, 10, 20 and 27  $\mu\text{m}$  (left to right). Arrowheads show ring position at furrow tips. Bars, 10  $\mu\text{m}$ . (A and B) Gray shading highlights phase 1 in wild-type embryos. (B) Arrow indicates injection time. (B and C)  $n = 6$  embryos per condition, five rings per embryo; mean  $\pm$  SE. \*,  $P < 0.05$ .

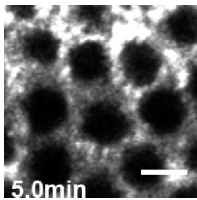

Video 1. **Ring constriction in a wild-type embryo visualized by injection of G-actin<sup>Red</sup>.** Time stamp indicates time after cellularization onset. Bar, 10  $\mu\text{m}$ .

Table S1. Compiled FRAP data

| Genotype or condition           | Ring number | Embryo number | $t_{1/2}$               | Mobile fraction         |
|---------------------------------|-------------|---------------|-------------------------|-------------------------|
|                                 |             |               | s                       | %                       |
| OreR                            | 49          | 30            | 16.6 ± 0.5              | 87.5 ± 1.1              |
| <i>sqh</i> <sup>WT</sup>        | 20          | 7             | 17.2 ± 1.2              | 89.7 ± 3.1              |
| <i>sqh</i> <sup>AA</sup>        | 10          | 4             | 16.4 ± 2.0              | 84.2 ± 2.9              |
| <i>rok</i> <sup>2</sup>         | 26          | 12            | 15.0 ± 0.9              | 65.8 ± 3.3 <sup>a</sup> |
| <i>1/2cofilin</i>               | 26          | 13            | 26.0 ± 1.3 <sup>a</sup> | 80.4 ± 2.2 <sup>a</sup> |
| DMSO injected                   | 9           | 9             | 17.7 ± 1.6              | 89.3 ± 3.3              |
| Phalloidin injected             | 7           | 7             | –                       | 35.8 ± 2.9 <sup>a</sup> |
| <i>anillin</i> <sup>HP/RS</sup> | 35          | 14            | 16.8 ± 0.6              | 80.3 ± 1.8 <sup>a</sup> |
| <i>1/2pnut</i>                  | 16          | 6             | 17.0 ± 0.8              | 83.7 ± 2.6              |

Values are mean ± SE.

<sup>a</sup>P < 0.05 when compared with wild type or relevant control, as specified in the text.

Table S2. Staining conditions for antibodies and probes

| Antibody or probe                                                           | Dilution or concentration | Staining condition    |
|-----------------------------------------------------------------------------|---------------------------|-----------------------|
| Mouse anti-Pnut (DSHB)                                                      | 1:5                       | 2 h, room temperature |
| Rabbit anti-Myosin-2 ( <i>Drosophila</i> Zipper; Sokac and Wieschaus, 2008) | 1:1,000                   | 2 h, room temperature |
| Rabbit anti-Mbs/MYPT1 (Ong et al., 2010)                                    | 1:1,000                   | Overnight, 4°C        |
| Rabbit anti-GFP (Abcam)                                                     | 1:1,000                   | Overnight, 4°C        |
| Rabbit anti-Cofilin (Signalway Antibody)                                    | 1:500                     | Overnight, 4°C        |
| Phalloidin–Alexa Fluor 546 (Invitrogen)                                     | 5 U/ml                    | Overnight, 4°C        |
| Goat anti–rabbit Alexa Fluor 488 (Invitrogen)                               | 1:500                     | 1 h, room temperature |
| Goat anti–mouse Alexa Fluor 488 (Invitrogen)                                | 1:500                     | 1 h, room temperature |

## References

- Ong, S., C. Foote, and C. Tan. 2010. Mutations of DMYPYPT cause over constriction of contractile rings and ring canals during *Drosophila* germline cyst formation. *Dev. Biol.* 346:161–169. <http://dx.doi.org/10.1016/j.ydbio.2010.06.008>
- Sokac, A.M., and E. Wieschaus. 2008. Local actin-dependent endocytosis is zygotically controlled to initiate *Drosophila* cellularization. *Dev. Cell.* 14:775–786. <http://dx.doi.org/10.1016/j.devcel.2008.02.014>
